# Supplementary material for: Monitoring ATP dynamics in electrically active white matter tracts
Source: eLife. 2017 Apr 17;6:e24241. doi: 10.7554/eLife.24241 (PMC5415357; doi:10.7554/eLife.24241)
Supplement: Figure 2—source data 1. — This xlsx-data file contains the data shown in Figure 2D,F and I. DOI: http://dx.doi.org/10.7554/eLife.24241.005 [file elife-24241-fig2-data1.xlsx]

## Sheet: Fig2-D
Figure 2D - source data
	MB+GD/Baseline
	YFP	CFP	FRET
n =1	0.918	1.083	0.7
n =2	0.967	1.135	0.799
n =3	0.965	1.214	0.688
n =4	0.937	1.072	0.745
n =5	0.966	1.141	0.772
n =6	0.997	1.274	0.723
n =7	0.968	1.204	0.74
n =8	1.006	1.316	0.796
n =9	1.053	1.259	0.761
n =10	1.016	1.265	0.812
n =11	1.003	1.308	0.835
n =12	0.977	1.31	0.733
n =13	0.99	1.23	0.842
n =14	1	1.229	0.773
n =15	1	1.349	0.785
n =16	0.918	1.072	0.688
n =17	0.966	1.173	0.736
n =18	0.99	1.23	0.772
n =19	1.008	1.291	0.823

## Sheet: Fig2-F
Figure 2F - source data
	Ratio
	Baseline	MB+GD
n =1	1.354	0.877959
n =2	1.53372	1.08265
n =3	2.0094	1.47789
n =4	1.88999	1.0708
n =5	1.72674	1.19339
n =6	1.68033	1.13851
n =7	1.87763	1.07455
n =8	1.40462	0.863404
n =9	1.70634	1.17092
n =10	1.54342	0.932917
n =11	1.55543	0.991334
n =12	2.04175	1.09735
n =13	2.29742	1.2866
n =14	1.74605	1.01235
n =15	2.28624	1.09351
n =16	2.15847	1.61043
n =17	2.23875	1.72129
n =18	2.24767	1.43872
n =19	2.31268	1.66355

## Sheet: Fig2-I
Figure 2I - source data
	Decay rate (1/s)
	CAP	ATP
n =1	-0.0126188	-0.0132727
n =2	-0.0120415	-0.0130326
n =3	-0.0136172	-0.0135515
