# Supplementary material for: Monitoring ATP dynamics in electrically active white matter tracts
Source: eLife. 2017 Apr 17;6:e24241. doi: 10.7554/eLife.24241 (PMC5415357; doi:10.7554/eLife.24241)
Supplement: Figure 3—source data 1. — This xlsx-data file contains the data shown in Figure 3D–H and Figure 3—Figure supplement 2. DOI: http://dx.doi.org/10.7554/eLife.24241.007 [file elife-24241-fig3-data1.xlsx]

## Sheet: Fig3-D
Figure 3D - source data
	Decay onset (min)
	GD		MB		MB+GD
	CAP	ATP	CAP	ATP	CAP	ATP
n=1	18.0012	15.9836	1.00008	1.44548	0.499877	-0.171162
n=2	12.0008	12.3331	2.50018	1.30164	0.499983	0.0236367
n=3	9.50072	10.5876	2.00018	1.63631	2.00017	-0.0732467
n=4	14.001	16.67	2.0002	1.25572	0.500108	0.190558

## Sheet: Fig3-E
Figure 3E - source data
	Decay rate (1/s)
	GD		MB		MB+GD
	CAP	ATP	CAP	ATP	CAP	ATP
n=1	-0.00125042	-0.00194273	-0.0140544	-0.00777631	-0.0155129	-0.0106679
n=2	-0.00124815	-0.00319777	-0.0133895	-0.00960758	-0.0129447	-0.0118213
n=3	-0.00431562	-0.00261969	-0.0114585	-0.00969352	-0.0110079	-0.0166152
n=4	-0.00253856	-0.00237049			-0.0131237	-0.013105

## Sheet: Fig3-F
Figure 3F - source data
	Recovery onset (min)
	GD		MB		MB+GD
	CAP	ATP	CAP	ATP	CAP	ATP
n=1	2.00495	14.0569	1.00044	2.21089	-5.83331e-06	0.83264
n=2	1.50559	13.3465	1.00042	1.15204	0.000349998	0.400865
n=3	5.50545	12.8164	0.500449	0.950803	0.500333	0.662593
n=4	3.5059	10.2749			0.500478	0.230547

## Sheet: Fig3-G
Figure 3G - source data
	Recovery rate (1/s)
	GD		MB		MB+GD
	CAP	ATP	CAP	ATP	CAP	ATP
n=1	0.000733997	0.000271836	0.00524488	0.00439345	0.0043612	0.00606953
n=2	0.000501089	0.000451053	0.00599405	0.00572118	0.00400333	0.00313428
n=3	0.000200351	0.000195927	0.00474418	0.00584312	0.00343251	0.00339281
n=4	0.000585879	0.00081449			0.00424849	0.00395545

## Sheet: Fig3-H
Figure 3H - source data
	Signal recovered
	GD		MB		MB+GD
	CAP	ATP	CAP	ATP	CAP	ATP
n=1	0.872582	0.416115	1.04805	0.905783	0.95721	0.848095
n=2	1.05632	0.501652	0.981939	0.928915	0.968408	0.91085
n=3	0.335819	0.143161	0.920937	0.964789	0.89968	0.767187
n=4	0.491584	0.551187			0.874306	0.894906

## Sheet: Fig3S2-A
Figure 3 - Figure supplement 2A - source data
	GD/Baseline
	YFP	CFP	FRET
n=1	1.01701	1.35536	0.76136
n=2	1.09167	1.13877	0.73691
n=3	1.00756	1.1734	0.73231
n=4	1.03098	1.28543	0.77761

## Sheet: Fig3S2-B
Figure 3 - Figure supplement 2B - source data
	MB/Baseline
	YFP	CFP	FRET
n=1	0.945	1.072	0.853
n=2	1.029	1.166	0.819
n=3	1.001	1.056	0.756
n=4	1.004	1.247	0.753
