# Supplementary material for: Monitoring ATP dynamics in electrically active white matter tracts
Source: eLife. 2017 Apr 17;6:e24241. doi: 10.7554/eLife.24241 (PMC5415357; doi:10.7554/eLife.24241)
Supplement: Figure 4—source data 1. — This xlsx-data file contains the data shown in Figure 4C,D,F and Figure 4—Figure supplement 5. DOI: http://dx.doi.org/10.7554/eLife.24241.011 [file elife-24241-fig4-data1.xlsx]

## Sheet: Fig4-C
Figure 4C - source data
	CAP
	16 Hz			50 Hz			100 Hz
	10 mM Glc	3.3 mM Glc	2 mM Glc	10 mM Glc	3.3 mM Glc	2 mM Glc	10 mM Glc	3.3 mM Glc	2 mM Glc
n=1	0.919573	0.933846	0.898544	0.807961	0.861688	0.833862	0.694653	0.776785	0.481701
n=2	0.952162	0.96028	0.880796	0.802577	0.854533	0.60597	0.680682	0.783632	0.170503
n=3	0.918853	0.974804	0.907728	0.794889	0.830571	0.706138	0.657432	0.73132	0.475831
n=4	0.946295	0.80165	0.895084	0.782223	0.662683	0.632689	0.630436	0.530126	0.320915
n=5	1.01047	0.913851		0.792844	0.810355		0.657213	0.655701

## Sheet: Fig4-D
Figure 4D - source data
	ATP
	16 Hz			50 Hz			100 Hz
	10 mM Glc	3.3 mM Glc	2 mM Glc	10 mM Glc	3.3 mM Glc	2 mM Glc	10 mM Glc	3.3 mM Glc	2 mM Glc
n=1	0.952546	0.916424	0.52691	0.843442	0.718323	0.319315	0.596585	0.528436	0.193142
n=2	0.930566	1.0018	0.786692	0.833867	0.753111	0.484881	0.640958	0.608301	0.29963
n=3	0.901273	0.950987	0.857606	0.863237	0.799452	0.554487	0.70955	0.590005	0.274787
n=4	0.902937	0.812251	0.987954	0.779904	0.738891	0.596958	0.733645	0.545151	0.323855
n=5	0.894136	0.930965		0.795048	0.831097		0.765388	0.713459

## Sheet: Fig4-F
Figure 4F - source data
	ATP/CAP Ratio
	16 Hz			50 Hz			100 Hz
	10 mM Glc	3.3 mM Glc	2 mM Glc	10 mM Glc	3.3 mM Glc	2 mM Glc	10 mM Glc	3.3 mM Glc	2 mM Glc
n=1	1.03586	0.981343	0.586404	1.04391	0.833623	0.382935	0.858825	0.680286	0.400959
n=2	0.977318	1.04324	0.893159	1.03899	0.881313	0.800174	0.94164	0.776258	1.75733
n=3	0.980867	0.975567	0.944784	1.08598	0.962534	0.785239	1.07927	0.806766	0.577488
n=4	0.954182	1.01322	1.10376	0.997036	1.115	0.943525	1.16371	1.02834	1.00916
n=5	0.884875	1.01873		1.00278	1.0256		1.1646	1.08809

## Sheet: Fig4S5-A
Figure 4 - Figure Supplement 5A - source data
	100 Hz/Baseline [10 mM Glc]
	YFP	CFP	FRET
n=1	0.996	1.006	0.945
n=2	1.002	1.025	0.934
n=3	1.008	1.047	0.976
n=4	0.957	1.009	0.946
n=5	0.963	1.208	0.915

## Sheet: Fig4S5-B
Figure 4 - Figure Supplement 5B - source data
	100 Hz/Baseline [3.3 mM Glc]
	YFP	CFP	FRET
n=1	0.904	0.993	0.817
n=2	1.026	1.127	0.932
n=3	0.964	1.061	0.832
n=4	0.9937	1.1018	0.9677
n=5	0.9757	1.1399	0.9311

## Sheet: Fig4S5-C
Figure 4 - Figure Supplement 5C - source data
	100 Hz/Baseline [2 mM Glc]
	YFP	CFP	FRET
n=1	1.002	1.099	0.794
n=2	0.915	1.046	0.749
n=3	1.008	1.033	0.781
n=4	0.963	1.061	0.833
