# Supplementary material for: Monitoring ATP dynamics in electrically active white matter tracts
Source: eLife. 2017 Apr 17;6:e24241. doi: 10.7554/eLife.24241 (PMC5415357; doi:10.7554/eLife.24241)
Supplement: Figure 5—source data 1. — This xlsx-data file contains the data shown in Figure 5A–D,F and Figure 5—Figure supplement 1B. DOI: http://dx.doi.org/10.7554/eLife.24241.018 [file elife-24241-fig5-data1.xlsx]

## Sheet: Fig5-A
Figure 5A - source data
	CAP
	16 Hz			50 Hz			100 Hz
	10 mM Glc	10 mM Lac	10 mM Pyr	10 mM Glc	10 mM Lac	10 mM Pyr	10 mM Glc	10 mM Lac	10 mM Pyr
n=1	0.919573	0.937941	0.81758	0.807961	0.790582	0.669143	0.694653	0.70231	0.563587
n=2	0.952163	0.948935	0.872285	0.802577	0.812481	0.617442	0.680682	0.64481	0.517485
n=3	0.918853	0.978394	0.988029	0.794889	0.790615	0.796597	0.657432	0.713009	0.681711
n=4	0.946295			0.782223			0.630436
n=5	1.01047			0.792844			0.657213

## Sheet: Fig5-B
Figure 5B - source data
	ATP
	16 Hz			50 Hz			100 Hz
	10 mM Glc	10 mM Lac	10 mM Pyr	10 mM Glc	10 mM Lac	10 mM Pyr	10 mM Glc	10 mM Lac	10 mM Pyr
n=1	0.952546	0.913512	0.811969	0.843442	0.792834	0.661942	0.596585	0.515582	0.533294
n=2	0.930566	0.952117	0.724308	0.833867	0.650021	0.522566	0.640958	0.544082	0.474272
n=3	0.901273	0.914738	0.922805	0.863237	0.741925	0.523098	0.70955	0.629171	0.413643
n=4	0.902937			0.779904			0.733645
n=5	0.894135			0.795048			0.765388

## Sheet: Fig5-C
Figure 5C - source data
	CAP
	16 Hz			50 Hz			100 Hz
	3.3 mM Glc	+D-Lac	+AR-C-155858	3.3 mM Glc	+D-Lac	+AR-C-155858	3.3 mM Glc	+D-Lac	+AR-C-155858
n=1	0.933847	0.942266	0.952717	0.861688	0.853016	0.913974	0.776785	0.739844	0.757652
n=2	0.96028	0.846459	0.903797	0.854533	0.685327	0.746388	0.783632	0.570339	0.652653
n=3	0.974804	0.804091	0.880053	0.830571	0.613943	0.779744	0.73132	0.521206	0.682946
n=4	0.80165	0.873456	0.880712	0.662683	0.686996	0.724877	0.530126	0.569553	0.648226
n=5	0.913851	0.920516	0.868037	0.810355	0.782686	0.645568	0.655701	0.537371	0.382077
n=6		0.857248	0.910495		0.411202	0.802811		0.254313	0.646045

## Sheet: Fig5-D
Figure 5D - source data
	ATP
	16 Hz			50 Hz			100 Hz
	3.3 mM Glc	+D-Lac	+AR-C-155858	3.3 mM Glc	+D-Lac	+AR-C-155858	3.3 mM Glc	+D-Lac	+AR-C-155858
n=1	0.916424	0.862897	0.821509	0.718323	0.459724	0.511383	0.528436	0.309902	0.220534
n=2	1.0018	0.707279	0.902764	0.753111	0.339304	0.47697	0.608301	0.314493	0.215904
n=3	0.950987	0.917323	0.74755	0.799452	0.448528	0.40873	0.590005	0.330059	0.318353
n=4	0.812251	0.559871	0.600871	0.738891	0.388707	0.192474	0.545151	0.30955	0.107916
n=5	0.930964	0.772932	0.865774	0.831097	0.312548	0.467778	0.713459	0.194867	0.375993

## Sheet: Fig5-F
Figure 5F - source data
	ATP/CAP Ratio
	16 Hz			50 Hz			100 Hz
	3.3 mM Glc	+D-Lac	+AR-C-155858	3.3 mM Glc	+D-Lac	+AR-C-155858	3.3 mM Glc	+D-Lac	+AR-C-155858
n=1	0.981343	0.915767	0.908953	0.833623	0.53894	0.685143	0.680286	0.418875	0.337904
n=2	1.04324	0.835573	1.02581	0.881313	0.495097	0.611701	0.776258	0.551414	0.316136
n=3	0.975567	1.05022	0.848802	0.962534	0.652883	0.563861	0.806766	0.579505	0.491114
n=4	1.01322	0.608214	0.692218	1.115	0.496632	0.298147	1.02834	0.576046	0.282446
n=5	1.01873	0.901643	0.950882	1.0256	0.760084	0.582676	1.08809	0.766251	0.581992

## Sheet: Fig5S1-B
Figure 5 - Figure Supplement 1B - source data
	ATP/CAP Ratio
	16 Hz			50 Hz			100 Hz
	Glc	Lac	Pyr	Glc	Lac	Pyr	Glc	Lac	Pyr
n=1	1.036	0.974	0.993	1.044	1.003	0.989	0.859	0.734	0.946
n=2	0.977	1.003	0.83	1.039	0.8	0.846	0.942	0.844	0.916
n=3	0.981	0.935	0.934	1.086	0.938	0.657	1.079	0.882	0.607
n=4	0.954			0.997			1.164
n=5	0.885			1.003			1.165
